# Supplementary material
Source: Springer Nature journal article supplement (https://www.springermedizin.de/resource/supplementary/13054_2011_9607_MOESM3_ESM.pdf/9706608)

# FRC (L)

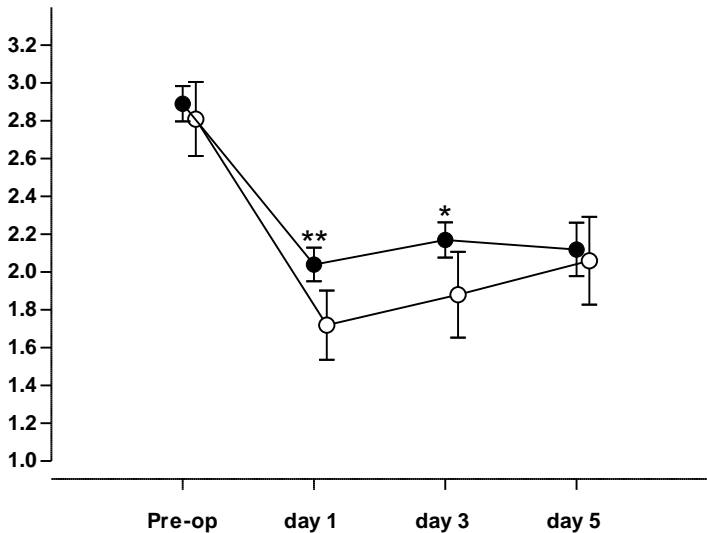

Supplement: MOESM3 [file 9706608]
